# Supplementary material
Source: PubMed Central journal article supplement (PMC11151779)
Supplement: PEDS_2022058813SupplementaryData.pdf [file PEDS_2022058813SupplementaryData.pdf]

## Supplemental Information

### Pathogenic Species Specified in the VON Manual of Operations

Achromobacter species (including *A. xylosoxidans* (also known as *Alcaligenes xylosoxidans*) and others);

Acinetobacter species including multidrug-resistant *Acinetobacter*;

*Aeromonas* species;

*Alcaligenes* species

(*A. xylosoxidans* and others);

*Bacteroides* species;

*Burkholderia* species (*B. capecia* and others);

*Campylobacter* species (*C. fetus*, *C. jejuni* and others) including drug-resistant *Campylobacter*;

*Chryseobacterium* species'

*Citrobacter* species (*C. diversus*, *C. freundii*, *C. koseri* and others);

*Clostridium* species;

*Enterobacter* species (*E. aerogenes*, *E. cloacae*, and others) including Carbapenem-resistant *Enterobacter*;

*Enterococcus* species (*E. faecalis* [also known as *Streptococcus faecalis*], *E. faecium*, and others) including Vancomycin-resistant *Enterococcus*;

*Escherichia coli* including Carbapenem-resistant *Escherichia coli*;

*Flavobacterium* species;

*Haemophilus* species

(*H. influenzae* and others);

*Klebsiella* species (*K. oxytoca*, *K. pneumoniae* and others) including

Carbapenem-resistant *Klebsiella* and Cephalosporin-resistant *Klebsiella*;

*Listeria monocytogenes*;

*Moraxella* species (*M. catarrhalis* [also known as *Branhamella catarrhalis*] and others);

*Morganella morganii*;

*Neisseria* species

(*N. meningitidis*, *N. gonorrhoeae* and others) including drug-resistant *N. gonorrhoeae*;

*Pantoea* species;

*Pasteurella* species;

*Prevotella* species;

*Proteus* species (*P. mirabilis*, *P. vulgaris* and others);

*Providencia* species (*P. rettgeri* and others);

*Pseudomonas* species (*P. aeruginosa* and others) including multidrug-resistant *Pseudomonas aeruginosa*;

*Ralstonia* species;

*Salmonella* species including drug-resistant *Salmonella* serotype Typhi;

*Serratia* species (*S. liquefaciens*, *S. marcescens* and others);

*Staphylococcus coagulase positive* (*aureus*) including MRSA and

Vancomycin-resistant

*Staphylococcus aureus*;

*Stenotrophomonas maltophilia*;

GBS (also known as *Streptococcus agalactiae*);

*Streptococcus anginosus* (formerly *Streptococcus milleri*)

*Streptococcus pneumoniae*

*Streptococcus pyogenes* (Group A *Streptococcus*)

**SUPPLEMENTAL TABLE 6** Incidence of Late-Onset Sepsis or Death by Pathogen Type, Overall and by Gestational Age

|              | Late-Onset Sepsis or Death <sup>a</sup> |              | Incidence Rate Per 1000 Eligible Infants <sup>a</sup> (99% CI) |               | Death or CONS <sup>b</sup> |             | Death or GBS <sup>b</sup> |             | Death or Other GP <sup>b</sup> |             | Death or GN <sup>b</sup> |             | Death or Fungal <sup>b</sup> |             |
|--------------|-----------------------------------------|--------------|----------------------------------------------------------------|---------------|----------------------------|-------------|---------------------------|-------------|--------------------------------|-------------|--------------------------|-------------|------------------------------|-------------|
|              | N                                       | No. (%)      | No. (%)                                                        | (99% CI)      | N                          | No. (%)     | N                         | No. (%)     | N                              | No. (%)     | N                        | No. (%)     | N                            | No. (%)     |
| Overall      | 118632                                  | 16024 (13.5) | 135.1                                                          | (132.5–137.6) | 118629                     | 10851 (9.2) | 118622                    | 8298 (7.0)  | 118627                         | 10564 (8.9) | 118623                   | 10413 (8.8) | 118622                       | 8229 (6.9)  |
| GA category, |                                         |              |                                                                |               |                            |             |                           |             |                                |             |                          |             |                              |             |
| completed wk |                                         |              |                                                                |               |                            |             |                           |             |                                |             |                          |             |                              |             |
| ≤23          | 5707                                    | 3137 (55.0)  | 549.7                                                          | (532.7–566.6) | 5706                       | 2440 (42.8) | 5706                      | 2028 (35.5) | 5706                           | 2323 (40.7) | 5706                     | 2412 (42.3) | 5706                         | 2098 (36.8) |
| 24–25        | 16675                                   | 5559 (33.1)  | 331.4                                                          | (322.1–340.8) | 16774                      | 3826 (22.8) | 16771                     | 2890 (17.2) | 16774                          | 3719 (22.2) | 16771                    | 3685 (22.0) | 16771                        | 2823 (17.4) |
| 26–27        | 23361                                   | 3671 (15.7)  | 157.1                                                          | (151.1–163.4) | 23358                      | 2308 (9.9)  | 23357                     | 1647 (7.1)  | 23358                          | 2241 (9.6)  | 23357                    | 2158 (9.2)  | 23357                        | 1597 (6.8)  |
| 28–29        | 32587                                   | 2224 (6.8)   | 68.2                                                           | (64.7–71.9)   | 32587                      | 1313 (4.0)  | 32587                     | 948 (2.9)   | 32587                          | 1290 (4.0)  | 32587                    | 1262 (3.9)  | 32587                        | 872 (2.7)   |
| >29          | 40198                                   | 1433 (3.7)   | 35.6                                                           | (33.3–38.1)   | 40198                      | 964 (2.4)   | 40197                     | 785 (2.0)   | 40198                          | 991 (2.5)   | 40198                    | 896 (2.2)   | 40197                        | 739 (1.8)   |

Twenty-eight infants were missing data on survival and were not included in the analysis. Four infants with missing GA were not included in the GA-specific counts. GN, gram-negative; GP, gram-positive.

<sup>a</sup> Infants with > 1 pathogen identified were counted once.

<sup>b</sup> Infants with > 1 pathogen identified were counted more than once.

**SUPPLEMENTAL TABLE 7** Distribution of Pathogens by Gestational Age Categories Among Infants With Late-Onset Sepsis

|          | ≤23 Wk, No. (%) <sup>a</sup> | 24–25 Wk, No. (%) <sup>b</sup> | 26–27 Wk, No. (%) <sup>c</sup> | 28–29 Wk, No. (%) <sup>d</sup> | >29 Wk, No (%) <sup>e</sup> | <i>P</i> <sup>f</sup> |
|----------|------------------------------|--------------------------------|--------------------------------|--------------------------------|-----------------------------|-----------------------|
| CONS     | 611 (27.2)                   | 1270 (29.5)                    | 899 (30.9)                     | 509 (29.1)                     | 270 (29.1)                  | .249                  |
| GBS      | 68 (3.0)                     | 149 (3.5)                      | 159 (5.5)                      | 124 (7.1)                      | 69 (7.1)                    | <.0001                |
| Other GP | 516 (23.0)                   | 1260 (29.2)                    | 877 (30.1)                     | 514 (29.4)                     | 320 (29.4)                  | <.0001                |
| GN       | 811 (36.1)                   | 1401 (32.5)                    | 870 (29.9)                     | 558 (31.9)                     | 235 (31.9)                  | <.0001                |
| Fungal   | 224 (10.0)                   | 229 (5.3)                      | 104 (3.6)                      | 44 (2.5)                       | 19 (2.5)                    | <.0001                |

Infants with >1 pathogen identified (polymicrobial infection and/or >1 episode of infection with different organisms) are included. GN, gram-negative; GP, gram-positive.

<sup>a</sup> Denominator ≤23 week: 2246 pathogens.

<sup>b</sup> Denominator 24–25 week: 4309 pathogens.

<sup>c</sup> Denominator 26–27 week: 2909 pathogens.

<sup>d</sup> Denominator 28–29 week: 1749 pathogens.

<sup>e</sup> Denominator >29 week: 913 pathogens.

<sup>f</sup> *P* value from Cochran-Mantel-Haenszel test for trend.

**SUPPLEMENTAL TABLE 8** Survival by Pathogen Type, Overall and by Gestational Age Category

|                           | No Late-Onset Sepsis |                | CONS     |             | GBS      |            | Other GP |             | GN       |             | Fungal   |            |
|---------------------------|----------------------|----------------|----------|-------------|----------|------------|----------|-------------|----------|-------------|----------|------------|
|                           | <i>N</i>             | No. (%)        | <i>N</i> | No. (%)     | <i>N</i> | No. (%)    | <i>N</i> | No. (%)     | <i>N</i> | No. (%)     | <i>N</i> | No. (%)    |
| Overall                   | 108 131              | 102 608 (94.9) | 3542     | 3029 (85.5) | 569      | 483 (84.9) | 3431     | 2744 (80.0) | 3691     | 2597 (70.4) | 620      | 414 (66.8) |
| GA category, completed wk |                      |                |          |             |          |            |          |             |          |             |          |            |
| ≤23 wk                    | 3869                 | 2570 (66.4)    | 610      | 458 (75.1)  | 68       | 47 (69.1)  | 516      | 342 (66.3)  | 766      | 431 (56.3)  | 224      | 117 (52.2) |
| 24–25 wk                  | 13 106               | 11 216 (85.6)  | 1268     | 1059 (83.5) | 149      | 125 (83.9) | 1232     | 951 (77.2)  | 1330     | 920 (69.2)  | 229      | 158 (69.0) |
| 26–27 wk                  | 20 778               | 19 690 (94.8)  | 885      | 793 (89.6)  | 159      | 136 (85.5) | 864      | 729 (84.4)  | 838      | 647 (77.2)  | 104      | 86 (82.7)  |
| 28–29 wk                  | 31 008               | 30 363 (97.9)  | 509      | 477 (93.7)  | 124      | 112 (90.3) | 507      | 454 (89.6)  | 530      | 426 (80.4)  | 44       | 36 (81.8)  |
| >29 wk                    | 39 366               | 38 765 (98.5)  | 270      | 242 (89.6)  | 69       | 63 (91.3)  | 312      | 268 (85.9)  | 227      | 173 (76.2)  | 19       | 17 (89.5)  |

Twenty-eight infants were missing data on survival and were not included in the analysis. Four infants with missing GA were not included in the GA-specific counts. Infants with >1 pathogen identified were counted more than once.

GN, gram-negative; GP, gram-positive.

**SUPPLEMENTAL TABLE 9** Length of Stay in Days Among Infants Who Did Not Survive to Hospital Discharge by Pathogen Type

|                           | No Late-Onset Sepsis |              | CONS     |              | GBS      |              | Other GP |              | GN       |              | Fungal   |              |
|---------------------------|----------------------|--------------|----------|--------------|----------|--------------|----------|--------------|----------|--------------|----------|--------------|
|                           | <i>N</i>             | Median (IQR) | <i>N</i> | Median (IQR) | <i>N</i> | Median (IQR) | <i>N</i> | Median (IQR) | <i>N</i> | Median (IQR) | <i>N</i> | Median (IQR) |
| Overall                   | 5523                 | 13 (6–31)    | 513      | 33 (15–91)   | 86       | 33 (14–56)   | 687      | 27 (14–60)   | 1094     | 17 (10–38)   | 206      | 21 (14–40)   |
| GA category, completed wk |                      |              |          |              |          |              |          |              |          |              |          |              |
| ≤23 wk                    | 1299                 | 10 (6–22)    | 152      | 30 (14–66)   | 21       | 18 (13–57)   | 174      | 24 (15–48)   | 335      | 16 (9–35)    | 107      | 21 (15–40)   |
| 24–25 wk                  | 1890                 | 12 (6–29)    | 209      | 34 (16–91)   | 24       | 42 (17–56)   | 281      | 26 (15–51)   | 410      | 18 (11–38)   | 71       | 20 (12–38)   |
| 26–27 wk                  | 1088                 | 15 (7–37)    | 92       | 34 (15–104)  | 23       | 33 (17–59)   | 135      | 28 (12–64)   | 191      | 16 (9–36)    | 18       | 28 (19–36)   |
| 28–29 wk                  | 645                  | 14 (7–40)    | 32       | 29 (13–135)  | 12       | 33 (26–46)   | 53       | 32 (18–67)   | 104      | 16 (9–45)    | 8        | 31 (16–106)  |
| >29 wk                    | 601                  | 19 (9–53)    | 28       | 84 (26–170)  | 6        | 29 (12–42)   | 44       | 68 (18–130)  | 54       | 24 (11–72)   | 2        | 44 (5–83)    |

Length of stay in days shown as median (IQR). Infants with >1 pathogen identified were counted more than once. Twenty-eight infants were missing data on survival and were not included in the analysis. Four infants with missing GA were not included in GA-specific counts. GN, gram-negative; GP, gram-positive.

**SUPPLEMENTAL TABLE 10** List of Centers Contributing Data to This Study

|                                                        |                 |            |
|--------------------------------------------------------|-----------------|------------|
| Ascension St. Vincent's Birmingham                     | Birmingham      | Alabama    |
| University of Alabama at Birmingham                    | Birmingham      | Alabama    |
| Huntsville Hospital                                    | Huntsville      | Alabama    |
| USA Children's and Women's Hospital                    | Mobile          | Alabama    |
| Children's Hospital at Providence, Alaska, The         | Anchorage       | Alaska     |
| Flagstaff Medical Center                               | Flagstaff       | Arizona    |
| Abrazo Arrowhead Campus                                | Glendale        | Arizona    |
| Banner Children's at Thunderbird                       | Glendale        | Arizona    |
| Banner Children's at Desert                            | Mesa            | Arizona    |
| Banner Estrella Medical Center                         | Phoenix         | Arizona    |
| Banner University Medical Center Phoenix               | Phoenix         | Arizona    |
| Phoenix Children's Hospital                            | Phoenix         | Arizona    |
| St. Joseph's Hospital and Medical Center               | Phoenix         | Arizona    |
| ValleywiseHealth Medical Center                        | Phoenix         | Arizona    |
| Banner University Medical Center, Tucson               | Tucson          | Arizona    |
| Washington Regional Medical Center                     | Fayetteville    | Arkansas   |
| Mercy Hospital Fort Smith                              | Fort Smith      | Arkansas   |
| Willow Creek Women's Hospital, NICU                    | Johnson         | Arkansas   |
| St. Bernards Medical Center                            | Jonesboro       | Arkansas   |
| Arkansas Children's Hospital                           | Little Rock     | Arkansas   |
| University of Arkansas for Medical Sciences            | Little Rock     | Arkansas   |
| Mercy Hospital Northwest Arkansas                      | Rogers          | Arkansas   |
| Anaheim Regional Medical Center                        | Anaheim         | California |
| KFH Orange County, Anaheim                             | Anaheim         | California |
| St. Mary Medical Center, Apple Valley                  | Apple Valley    | California |
| Methodist Hospital of Southern California              | Arcadia         | California |
| Adventist Health Bakersfield                           | Bakersfield     | California |
| Bakersfield Memorial Hospital                          | Bakersfield     | California |
| Kern Medical Center                                    | Bakersfield     | California |
| KFH Baldwin Park                                       | Baldwin Park    | California |
| Alta Bates Summit Medical Center                       | Berkeley        | California |
| Providence St. Joseph Medical Center                   | Burbank         | California |
| Mercy San Juan Medical Center                          | Carmichael      | California |
| Rady Children's at Scripps Mercy Chula Vista           | Chula Vista     | California |
| Sharp Chula Vista Medical Center                       | Chula Vista     | California |
| Clovis Community Medical Center                        | Clovis          | California |
| Arrowhead Regional Medical Center                      | Colton          | California |
| KFH Downey                                             | Downey          | California |
| Rady Children's at Scripps Encinitas Memorial Hosp     | Encinitas       | California |
| Rady Children's at Palomar Medical Center Escondido    | Escondido       | California |
| Northbay Medical Center                                | Fairfield       | California |
| KFH Fontana                                            | Fontana         | California |
| Fountain Valley Regional Hospital & Medical Center     | Fountain Valley | California |
| Washington Hospital - Fremont                          | Fremont         | California |
| San Joaquin General Hospital                           | French Camp     | California |
| Community Regional Med. Center, Fresno                 | Fresno          | California |
| Valley Children's Hospital at St. Agnes Medical Center | Fresno          | California |
| St. Jude Medical Center                                | Fullerton       | California |
| Adventist Health, Glendale                             | Glendale        | California |
| Glendale Memorial Hospital and Health Center           | Glendale        | California |
| MarinHealth Medical Center                             | Greenbrae       | California |
| KFH South Bay                                          | Harbor City     | California |
| Centinela Hospital Medical Center                      | Inglewood       | California |
| KFH Orange County, Irvine                              | Irvine          | California |
| Rady Children's at Scripps La Jolla                    | La Jolla        | California |
| UCSD Health La Jolla, Jacobs Medical Center            | La Jolla        | California |
| Grossmont Hospital, Women's Health Center              | La Mesa         | California |
| Memorialcare Saddleback Medical Center                 | Laguna Hills    | California |
| Antelope Valley Hospital                               | Lancaster       | California |
| Loma Linda University Children's Hospital              | Loma Linda      | California |
| Memorialcare Miller Children's & Women's Hospital      | Long Beach      | California |
| St. Mary Medical Center                                | Long Beach      | California |
| Adventist Health, White Memorial                       | Los Angeles     | California |

**SUPPLEMENTAL TABLE 10** Continued

|                                                             |                |            |
|-------------------------------------------------------------|----------------|------------|
| California Hospital Medical Center, Los Angeles             | Los Angeles    | California |
| Cedars-Sinai Medical Center                                 | Los Angeles    | California |
| Children's Hospital Los Angeles                             | Los Angeles    | California |
| Hollywood Presbyterian Medical Center                       | Los Angeles    | California |
| KFH Los Angeles                                             | Los Angeles    | California |
| KFH West Los Angeles                                        | Los Angeles    | California |
| LAC/USC Medical Center                                      | Los Angeles    | California |
| PIH Health Good Samaritan Hospital                          | Los Angeles    | California |
| UCLA Mattel Children's Hospital                             | Los Angeles    | California |
| St. Francis Medical Center                                  | Lynwood        | California |
| Valley Children's Hospital                                  | Madera         | California |
| Providence Holy Cross Medical Center                        | Mission Hills  | California |
| CHOC Children's at Mission Hospital                         | Mission Viejo  | California |
| Doctors Medical Center of Modesto                           | Modesto        | California |
| KFH Modesto                                                 | Modesto        | California |
| Memorial Medical Center, Modesto                            | Modesto        | California |
| Garfield Medical Center                                     | Monterey Park  | California |
| Riverside University Health System Medical Center           | Moreno Valley  | California |
| El Camino Hospital                                          | Mountain View  | California |
| Rady Children's at Rancho Springs Medical Center            | Murrieta       | California |
| Hoag Memorial Hospital, Presbyterian                        | Newport Beach  | California |
| Northridge Hospital Medical Center                          | Northridge     | California |
| KFH Oakland                                                 | Oakland        | California |
| UCSF Benioff Children's Hospital, Oakland                   | Oakland        | California |
| Tri-City Medical Center                                     | Oceanside      | California |
| KFH Ontario Campus                                          | Ontario        | California |
| CHOC Children's Hospital                                    | Orange         | California |
| UC Irvine Medical Center                                    | Orange         | California |
| St. John's Regional Medical Center                          | Oxnard         | California |
| Desert Regional Medical Center                              | Palm Springs   | California |
| Lucile Packard Children's Hospital Stanford                 | Palo Alto      | California |
| KFH Panorama City                                           | Panorama City  | California |
| Huntington Memorial Hospital                                | Pasadena       | California |
| Pomona Valley Hospital Medical Center                       | Pomona         | California |
| Mercy Medical Center, Redding                               | Redding        | California |
| Redlands Community Hospital                                 | Redlands       | California |
| LPGH Special Care Nursery at Sequoia Hospital               | Redwood City   | California |
| AHMC Parkview Community Medical Center                      | Riverside      | California |
| KFH Riverside                                               | Riverside      | California |
| Riverside Community Hospital                                | Riverside      | California |
| KFH Roseville                                               | Roseville      | California |
| Sutter Roseville Medical Center                             | Roseville      | California |
| Anderson Lucchetti Women's and Children's Center            | Sacramento     | California |
| Methodist Hospital of Sacramento                            | Sacramento     | California |
| UC Davis Medical Center                                     | Sacramento     | California |
| Natividad Medical Center                                    | Salinas        | California |
| Salinas Valley Memorial Hospital                            | Salinas        | California |
| Community Hospital of San Bernardino                        | San Bernardino | California |
| St. Bernardine Medical Center                               | San Bernardino | California |
| KFH San Diego                                               | San Diego      | California |
| Rady Children's Hospital San Diego                          | San Diego      | California |
| Rady Children's at Scripps Mercy Hospital San Diego         | San Diego      | California |
| Sharp Mary Birch Hospital for Women and Newborns            | San Diego      | California |
| UCSD Medical Center, Hillcrest                              | San Diego      | California |
| California Pacific Medical Center Van Ness Campus           | San Francisco  | California |
| KFH San Francisco                                           | San Francisco  | California |
| UCSF Benioff Children's Hospital in San Francisco           | San Francisco  | California |
| Zuckerberg San Francisco General Hospital and Trauma Center | San Francisco  | California |
| San Gabriel Valley Medical Center                           | San Gabriel    | California |
| Good Samaritan Hospital, San Jose                           | San Jose       | California |
| O'Connor Hospital, San Jose                                 | San Jose       | California |
| Santa Clara Valley Medical Center                           | San Jose       | California |

**SUPPLEMENTAL TABLE 10** Continued

|                                                         |                  |                      |
|---------------------------------------------------------|------------------|----------------------|
| KFH San Leandro                                         | San Leandro      | California           |
| Sierra Vista Regional Medical Center                    | San Luis Obispo  | California           |
| Orange County Global Medical Center                     | Santa Ana        | California           |
| Santa Barbara Cottage Hospital                          | Santa Barbara    | California           |
| KFH Santa Clara                                         | Santa Clara      | California           |
| Dignity Health Dominican Hospital                       | Santa Cruz       | California           |
| Marian Regional Medical Center                          | Santa Maria      | California           |
| Providence St. John's Health Center                     | Santa Monica     | California           |
| Santa Monica, UCLA Medical Center & Orthopedic Hospital | Santa Monica     | California           |
| Santa Rosa Memorial Hospital                            | Santa Rosa       | California           |
| Sutter Santa Rosa Regional Hospital                     | Santa Rosa       | California           |
| St. Joseph's Medical Center, Stockton                   | Stockton         | California           |
| LAC/Olive View, UCLA Medical Center                     | Sylmar           | California           |
| Providence Cedars-Sinai Tarzana Medical Center          | Tarzana          | California           |
| Los Robles Regional Hospital & Medical Center           | Thousand Oaks    | California           |
| LAC/Harbor, UCLA Medical Center                         | Torrance         | California           |
| Providence Little Company of Mary Medical Center        | Torrance         | California           |
| Torrance Memorial Medical Center                        | Torrance         | California           |
| San Antonio Regional Hospital                           | Upland           | California           |
| Henry Mayo Newhall Memorial Hospital                    | Valencia         | California           |
| Valley Presbyterian Hospital                            | Van Nuys         | California           |
| Community Memorial Hospital of Ventura                  | Ventura          | California           |
| Ventura County Medical Center                           | Ventura          | California           |
| Kaweah $\Delta$ Healthcare District                     | Visalia          | California           |
| John Muir Health, Walnut Creek Medical Center           | Walnut Creek     | California           |
| KFH Walnut Creek                                        | Walnut Creek     | California           |
| Emanate Health, Queen of the Valley Hospital            | West Covina      | California           |
| Presbyterian Intercommunity Hospital (PIH Health)       | Whittier         | California           |
| KFH Woodland Hills                                      | Woodland Hills   | California           |
| Medical Center of Aurora                                | Aurora           | Colorado             |
| UCHSC                                                   | Aurora           | Colorado             |
| St. Francis Medical Center                              | Colorado Springs | Colorado             |
| Denver Health Medical Center                            | Denver           | Colorado             |
| Rocky Mountain Hospital for Children at P/SL            | Denver           | Colorado             |
| Rose Medical Center                                     | Denver           | Colorado             |
| Saint Joseph Hospital                                   | Denver           | Colorado             |
| Swedish Medical Center                                  | Englewood        | Colorado             |
| Poudre Valley Hospital                                  | Fort Collins     | Colorado             |
| St. Mary's Hospital and Medical Center                  | Grand Junction   | Colorado             |
| Banner Health Northern Colorado Medical Center          | Greeley          | Colorado             |
| Good Samaritan Medical Center                           | Lafayette        | Colorado             |
| Sky Ridge Medical Center                                | Lone Tree        | Colorado             |
| Yale-New Haven Children's at Bridgeport Hospital        | Bridgeport       | Connecticut          |
| Danbury Hospital                                        | Danbury          | Connecticut          |
| Connecticut Children's NICU at UCONN Health Center      | Farmington       | Connecticut          |
| Greenwich Hospital                                      | Greenwich        | Connecticut          |
| Connecticut Children's Medical Center                   | Hartford         | Connecticut          |
| St. Francis Hospital                                    | Hartford         | Connecticut          |
| Hospital of Central Connecticut, The                    | New Britain      | Connecticut          |
| Yale-New Haven Children's Hospital                      | New Haven        | Connecticut          |
| Norwalk Hospital                                        | Norwalk          | Connecticut          |
| Stamford Hospital                                       | Stamford         | Connecticut          |
| ChristianaCare                                          | Newark           | Delaware             |
| MedStar Georgetown University Hospital                  | Washington       | District Of Columbia |
| Washington Hospital Center                              | Washington       | District Of Columbia |
| Brandon Regional Hospital                               | Brandon          | Florida              |
| HCA Florida University Hospital                         | Davie            | Florida              |
| Halifax Medical Center                                  | Daytona Beach    | Florida              |
| Broward Health Medical Center/Salah Foundation $\chi$   | Fort Lauderdale  | Florida              |
| Golisano Children's Hospital of Southwest Florida       | Fort Myers       | Florida              |
| Lawnwood Regional Medical Center & Heart Institute      | Fort Pierce      | Florida              |
| North Florida Regional Medical Center, Inc.             | Gainesville      | Florida              |

**SUPPLEMENTAL TABLE 10** Continued

|                                                    |                   |          |
|----------------------------------------------------|-------------------|----------|
| UF Shands Hospital Gainesville                     | Gainesville       | Florida  |
| Joe DiMaggio Children's Hospital                   | Hollywood         | Florida  |
| UF Health Jacksonville                             | Jacksonville      | Florida  |
| Wolfson Children's Hospital                        | Jacksonville      | Florida  |
| Osceola Regional Medical Center                    | Kissimmee         | Florida  |
| Lakeland Regional Health Medical Center            | Lakeland          | Florida  |
| Northwest Medical Center                           | Margate           | Florida  |
| Baptist Children's Hospital                        | Miami             | Florida  |
| Jackson Memorial Hospital                          | Miami             | Florida  |
| Kendall Regional Medical Center                    | Miami             | Florida  |
| Mercy Hospital                                     | Miami             | Florida  |
| Nicklaus Children's Hospital                       | Miami             | Florida  |
| Orange Park Medical Center                         | Orange Park       | Florida  |
| AdventHealth for Children                          | Orlando           | Florida  |
| Nemours Children's Hospital                        | Orlando           | Florida  |
| Winnie Palmer Hospital for Women and Babies        | Orlando           | Florida  |
| Gulf Coast Regional Medical Center                 | Panama City       | Florida  |
| Studer Family Children's Hospital at Ascension Sac | Pensacola         | Florida  |
| Bayfront Health Port Charlotte                     | Port Charlotte    | Florida  |
| Johns Hopkins All Children's Hospital              | Saint Petersburg  | Florida  |
| All Children's at Sarasota Memorial                | Sarasota          | Florida  |
| Tallahassee Memorial Hospital                      | Tallahassee       | Florida  |
| St. Joseph's Children's Hospital                   | Tampa             | Florida  |
| Tampa General Hospital                             | Tampa             | Florida  |
| Women's Center, Advent Health Tampa                | Tampa             | Florida  |
| Wellington Regional Medical Center                 | Wellington        | Florida  |
| Phoebe Putney Memorial Hospital                    | Albany            | Georgia  |
| Piedmont Athens Regional                           | Athens            | Georgia  |
| Emory University Hospital, Midtown                 | Atlanta           | Georgia  |
| Grady Memorial Hospital                            | Atlanta           | Georgia  |
| Northside Hospital                                 | Atlanta           | Georgia  |
| Piedmont Hospital                                  | Atlanta           | Georgia  |
| Augusta University Health System                   | Augusta           | Georgia  |
| Wellstar Cobb Hospital                             | Austell           | Georgia  |
| Northside Hospital Cherokee                        | Canton            | Georgia  |
| Medical Center at Columbus Regional, The           | Columbus          | Georgia  |
| Piedmont Rockdale Hospital                         | Conyers           | Georgia  |
| Northside Hospital Forsyth                         | Cumming           | Georgia  |
| Hamilton Medical Center                            | Dalton            | Georgia  |
| Piedmont Fayette Hospital                          | Fayetteville      | Georgia  |
| Northeast Georgia Medical Center                   | Gainesville       | Georgia  |
| Emory Johns Creek Hospital                         | Johns Creek       | Georgia  |
| Gwinnett Hospital System                           | Lawrenceville     | Georgia  |
| Coliseum Medical Center                            | Macon             | Georgia  |
| Wellstar Kennestone Hospital                       | Marietta          | Georgia  |
| Floyd Medical Center                               | Rome              | Georgia  |
| Memorial Health Savannah                           | Savannah          | Georgia  |
| St. Joseph's/Candler Health System                 | Savannah          | Georgia  |
| Eastside Medical Center                            | Snellville        | Georgia  |
| Piedmont Henry Hospital                            | Stockbridge       | Georgia  |
| Kaiser Permanente Moanalua Medical Center          | Honolulu          | Hawaii   |
| Kapiolani Medical Center for Women & Children      | Honolulu          | Hawaii   |
| St. Luke's Regional Medical Center                 | Boise             | Idaho    |
| Kootenai Health                                    | Coeur d'Alene     | Idaho    |
| Eastern Idaho Regional Medical Center              | Idaho Falls       | Idaho    |
| St. Luke's Meridian Medical Center                 | Meridian          | Idaho    |
| St. Luke's Magic Valley                            | Twin Falls        | Idaho    |
| Northwest Community Healthcare                     | Arlington Heights | Illinois |
| Rush Copley Medical Center                         | Aurora            | Illinois |
| Memorial Hospital of Carbondale                    | Carbondale        | Illinois |
| Advocate Illinois Masonic Medical Center           | Chicago           | Illinois |
| John H. Stroger, Jr. Hospital of Cook County       | Chicago           | Illinois |

**SUPPLEMENTAL TABLE 10** Continued

|                                          |                 |          |
|------------------------------------------|-----------------|----------|
| Mercy Hospital and Medical Center        | Chicago         | Illinois |
| Mt. Sinai Hospital Medical Center        | Chicago         | Illinois |
| Northwestern Memorial                    | Chicago         | Illinois |
| Rush University Medical Center           | Chicago         | Illinois |
| St. Joseph Hospital Chicago              | Chicago         | Illinois |
| University of Chicago                    | Chicago         | Illinois |
| University of Illinois at Chicago        | Chicago         | Illinois |
| Advocate Good Samaritan Hospital         | Downers Grove   | Illinois |
| Elmhurst Hospital                        | Elmhurst        | Illinois |
| Evanston Hospital                        | Evanston        | Illinois |
| Adventist Hinsdale Hospital              | Hinsdale        | Illinois |
| St. Alexius Medical Center               | Hoffman Estates | Illinois |
| Amita Health St. Joseph Medical Center   | Joliet          | Illinois |
| RMCH at Loyola University Medical Center | Maywood         | Illinois |
| Centegra Hospital-McHenry                | McHenry         | Illinois |
| UnityPoint Trinity-Moline                | Moline          | Illinois |
| Edward Hospital and Health Services      | Naperville      | Illinois |
| Advocate Children's Hospital, Oak Lawn   | Oak Lawn        | Illinois |
| Advocate Children's Hospital, Park Ridge | Park Ridge      | Illinois |
| CHOI at OSF St. Francis Medical Center   | Peoria          | Illinois |
| UnityPoint Health-Methodist Hospital     | Peoria          | Illinois |
| Javon Bea Hospital, Riverside            | Rockford        | Illinois |
| SwedishAmerican Hospital                 | Rockford        | Illinois |
| St. John's Hospital                      | Springfield     | Illinois |
| Carle Foundation Hospital                | Urbana          | Illinois |
| Central DuPage Hospital                  | Winfield        | Illinois |
| Ascension St. Vincent Carmel             | Carmel          | Indiana  |
| IU Health North Hospital                 | Carmel          | Indiana  |
| Franciscan Health Crown Point            | Crown Point     | Indiana  |
| Ascension St. Vincent Evansville         | Evansville      | Indiana  |
| Dupont Hospital                          | Fort Wayne      | Indiana  |
| Lutheran Hospital of Indiana             | Fort Wayne      | Indiana  |
| Parkview Women's and Children's Hospital | Fort Wayne      | Indiana  |
| Ascension St. Vincent Hospital, Women's  | Indianapolis    | Indiana  |
| Community Hospital North Indianapolis    | Indianapolis    | Indiana  |
| Franciscan St. Francis Health            | Indianapolis    | Indiana  |
| Riley Hospital for Children at IU Health | Indianapolis    | Indiana  |
| Clark Memorial Health                    | Jeffersonville  | Indiana  |
| Franciscan Health Lafayette              | Lafayette       | Indiana  |
| Saint Joseph Regional Medical Center     | Mishawaka       | Indiana  |
| Ball Memorial Hospital                   | Muncie          | Indiana  |
| Community Hospital                       | Munster         | Indiana  |
| Women's Hospital                         | Newburgh        | Indiana  |
| Memorial Hospital                        | South Bend      | Indiana  |
| Union Hospital                           | Terre Haute     | Indiana  |
| UnityPoint Trinity-Bettendorf NSCU       | Bettendorf      | Iowa     |
| St. Luke's Hospital                      | Cedar Rapids    | Iowa     |
| Genesis Medical Center                   | Davenport       | Iowa     |
| Blank Children's Hospital                | Des Moines      | Iowa     |
| Mercy Medical Center                     | Des Moines      | Iowa     |
| University of Iowa Children's Hospital   | Iowa City       | Iowa     |
| St. Luke's Regional Medical Center       | Sioux City      | Iowa     |
| Covenant Medical Center                  | Waterloo        | Iowa     |
| University of Kansas Hospital Authority  | Kansas City     | Kansas   |
| Overland Park Regional Medical Center    | Overland Park   | Kansas   |
| AdventHealth Shawnee Mission             | Shawnee Mission | Kansas   |
| Ascension Via Christi Hospital           | Wichita         | Kansas   |
| Wesley Medical Center                    | Wichita         | Kansas   |
| King's Daughters Medical Center          | Ashland         | Kentucky |
| The Medical Center NICU Bowling Green    | Bowling Green   | Kentucky |
| St. Elizabeth Healthcare                 | Edgewood        | Kentucky |
| Hardin Memorial Hospital                 | Elizabethtown   | Kentucky |

**SUPPLEMENTAL TABLE 10** Continued

|                                                   |               |               |
|---------------------------------------------------|---------------|---------------|
| Frankfort Regional Medical Center                 | Frankfort     | Kentucky      |
| Deaconess Henderson Hospital                      | Henderson     | Kentucky      |
| Jennie Stuart Medical Center                      | Hopkinsville  | Kentucky      |
| Baptist Health Lexington                          | Lexington     | Kentucky      |
| Kentucky Children's Hospital                      | Lexington     | Kentucky      |
| Women's Hospital at St. Joseph East, The          | Lexington     | Kentucky      |
| Baptist Health Louisville                         | Louisville    | Kentucky      |
| Norton Children's Hospital                        | Louisville    | Kentucky      |
| Norton Women's and Children's Hospital            | Louisville    | Kentucky      |
| University of Louisville Hospital                 | Louisville    | Kentucky      |
| Baptist Health Deaconess Madisonville             | Madisonville  | Kentucky      |
| Owensboro Health Regional Hospital                | Owensboro     | Kentucky      |
| Baptist Health Paducah                            | Paducah       | Kentucky      |
| Pikeville Medical Center                          | Pikeville     | Kentucky      |
| Christus St. Frances Cabrini Hospital             | Alexandria    | Louisiana     |
| Rapides Women's and Children's Hospital           | Alexandria    | Louisiana     |
| Baton Rouge General Medical Center, Bluebonnet    | Baton Rouge   | Louisiana     |
| Ochsner Medical Center Baton Rouge                | Baton Rouge   | Louisiana     |
| Woman's Hospital                                  | Baton Rouge   | Louisiana     |
| Lakeview Regional Medical Center                  | Covington     | Louisiana     |
| St. Tammany Parish Hospital                       | Covington     | Louisiana     |
| Ochsner Medical Center WestBank                   | Gretna        | Louisiana     |
| North Oaks Medical Center                         | Hammond       | Louisiana     |
| Terrebonne General Medical Center                 | Houma         | Louisiana     |
| Lafayette General Medical Center                  | Lafayette     | Louisiana     |
| Our Lady of Lourdes Women's & Children's Hospital | Lafayette     | Louisiana     |
| Christus Lake Area Hospital                       | Lake Charles  | Louisiana     |
| Lake Charles Memorial Hosp for Women              | Lake Charles  | Louisiana     |
| West Jefferson Medical Center                     | Marrero       | Louisiana     |
| East Jefferson General Hospital                   | Metairie      | Louisiana     |
| Tulane Lakeside Hospital                          | Metairie      | Louisiana     |
| St. Francis Medical Center                        | Monroe        | Louisiana     |
| Children's Hospital of New Orleans                | New Orleans   | Louisiana     |
| Ochsner Baptist Medical Center                    | New Orleans   | Louisiana     |
| Touro Infirmary                                   | New Orleans   | Louisiana     |
| CHRISTUS Highland                                 | Shreveport    | Louisiana     |
| Ochsner LSU Health St. Mary Medical Center        | Shreveport    | Louisiana     |
| Willis Knighton South                             | Shreveport    | Louisiana     |
| Slideell Memorial Hospital                        | Slidell       | Louisiana     |
| Eastern Maine Medical Center                      | Bangor        | Maine         |
| Barbara Bush Children's at Maine Medical          | Portland      | Maine         |
| Anne Arundel Medical Center                       | Annapolis     | Maryland      |
| Ascension Saint Agnes Hospital                    | Baltimore     | Maryland      |
| Franklin Square Hospital Center                   | Baltimore     | Maryland      |
| Greater Baltimore Medical Center                  | Baltimore     | Maryland      |
| JHBMC Hopkins Bayview Medical Center              | Baltimore     | Maryland      |
| Johns Hopkins Hospital                            | Baltimore     | Maryland      |
| Mercy Medical Center, Baltimore                   | Baltimore     | Maryland      |
| Sinai Hospital of Baltimore                       | Baltimore     | Maryland      |
| Univ of Maryland Medical Center                   | Baltimore     | Maryland      |
| Walter Reed National Mil Med Center NICU          | Bethesda      | Maryland      |
| University of Maryland Capital Region Medical     | Cheverly      | Maryland      |
| Howard County General Hospital                    | Columbia      | Maryland      |
| Frederick Memorial Hospital                       | Frederick     | Maryland      |
| Shady Grove Adventist Hospital                    | Rockville     | Maryland      |
| Holy Cross Hospital                               | Silver Spring | Maryland      |
| Univ of Maryland St. Joseph Medical Center        | Towson        | Maryland      |
| Beth Israel Deaconess Medical Center              | Boston        | Massachusetts |
| Boston Medical Center                             | Boston        | Massachusetts |
| Brigham and Women's Hospital                      | Boston        | Massachusetts |
| Massachusetts General Hospital for Children       | Boston        | Massachusetts |
| Tufts Medical Center                              | Boston        | Massachusetts |

**SUPPLEMENTAL TABLE 10** Continued

|                                                 |                |               |
|-------------------------------------------------|----------------|---------------|
| Steward St. Elizabeth's Medical Center          | Brighton       | Massachusetts |
| South Shore Hospital                            | South Weymouth | Massachusetts |
| Baystate Medical Center                         | Springfield    | Massachusetts |
| UMass Memorial Healthcare                       | Worcester      | Massachusetts |
| St. Joseph Mercy Hospital                       | Ann Arbor      | Michigan      |
| U. of MI, CS Mott Children's, Brandon NICU      | Ann Arbor      | Michigan      |
| Beaumont Hospital, Dearborn                     | Dearborn       | Michigan      |
| Ascension St. John Hospital                     | Detroit        | Michigan      |
| Children's Hospital of Michigan                 | Detroit        | Michigan      |
| DMC Sinai-Grace Hospital                        | Detroit        | Michigan      |
| Henry Ford Hospital                             | Detroit        | Michigan      |
| Hutzel Women's Hospital                         | Detroit        | Michigan      |
| Hurley Medical Center                           | Flint          | Michigan      |
| Helen DeVos Children's Hospital                 | Grand Rapids   | Michigan      |
| Mercy Health Saint Mary's                       | Grand Rapids   | Michigan      |
| Henry Ford Allegiance Health                    | Jackson        | Michigan      |
| Children's Hospital at Bronson                  | Kalamazoo      | Michigan      |
| Sparrow Hospital                                | Lansing        | Michigan      |
| UPHS-Marquette                                  | Marquette      | Michigan      |
| St. Joseph Mercy Oakland                        | Pontiac        | Michigan      |
| William Beaumont Hospital                       | Royal Oak      | Michigan      |
| Covenant Healthcare                             | Saginaw        | Michigan      |
| Ascension Providence Hospital Southfield Campus | Southfield     | Michigan      |
| Munson Medical Center                           | Traverse City  | Michigan      |
| Essentia Health, St. Mary's Children's Hospital | Duluth         | Minnesota     |
| Maple Grove Hospital                            | Maple Grove    | Minnesota     |
| Children's Minnesota, Minneapolis               | Minneapolis    | Minnesota     |
| Hennepin County Medical Center                  | Minneapolis    | Minnesota     |
| University of MN Masonic Children's Hospital    | Minneapolis    | Minnesota     |
| North Memorial Medical Center                   | Robbinsdale    | Minnesota     |
| Mayo Foundation                                 | Rochester      | Minnesota     |
| St. Cloud Hospital                              | Saint Cloud    | Minnesota     |
| Children's Minnesota-St. Paul                   | Saint Paul     | Minnesota     |
| Merit Health River Oaks                         | Flowood        | Mississippi   |
| Merit Health Woman's Hospital                   | Flowood        | Mississippi   |
| Δ Regional Medical Center                       | Greenville     | Mississippi   |
| Memorial Hospital at Gulfport                   | Gulfport       | Mississippi   |
| Forrest General Hospital                        | Hattiesburg    | Mississippi   |
| Merit Health Wesley                             | Hattiesburg    | Mississippi   |
| Children's Hospital at U. of MS Health Care     | Jackson        | Mississippi   |
| Merit Health Central                            | Jackson        | Mississippi   |
| Mississippi Baptist Health Systems              | Jackson        | Mississippi   |
| St. Dominic, Jackson Memorial Hospital          | Jackson        | Mississippi   |
| North Mississippi Medical Center                | Tupelo         | Mississippi   |
| St. Francis Medical Center                      | Cape Girardeau | Missouri      |
| Women's & Children's Hosp, U. of MO             | Columbia       | Missouri      |
| Centerpoint Medical Center                      | Independence   | Missouri      |
| Freeman Hospital and Health System              | Joplin         | Missouri      |
| Mercy Hospital Joplin                           | Joplin         | Missouri      |
| Children's Mercy Kansas City                    | Kansas City    | Missouri      |
| Research Medical Center                         | Kansas City    | Missouri      |
| St. Luke's Hospital                             | Kansas City    | Missouri      |
| Truman Medical Center                           | Kansas City    | Missouri      |
| Mercy Children's Hospital, St. Louis            | Saint Louis    | Missouri      |
| SSM Health Cardinal Glennon Children's Hospital | Saint Louis    | Missouri      |
| St. Louis Children's Hospital                   | Saint Louis    | Missouri      |
| Cox Health - Neonatology                        | Springfield    | Missouri      |
| Mercy Kids Springfield                          | Springfield    | Missouri      |
| Billings Clinic                                 | Billings       | Montana       |
| St. Vincent Hospital & Health Center            | Billings       | Montana       |
| Benefis Healthcare                              | Great Falls    | Montana       |
| Logan Health                                    | Kalispell      | Montana       |

**SUPPLEMENTAL TABLE 10** Continued

|                                                    |               |               |
|----------------------------------------------------|---------------|---------------|
| Community Medical Center                           | Missoula      | Montana       |
| Bryan Medical Center                               | Lincoln       | Nebraska      |
| CHI Health St. Elizabeth                           | Lincoln       | Nebraska      |
| CHI Health Bergan Mercy Medical Center             | Omaha         | Nebraska      |
| Methodist Women's Hospital                         | Omaha         | Nebraska      |
| Nebraska Medical Center                            | Omaha         | Nebraska      |
| St. Rose Dominican Hospital Siena Campus           | Henderson     | Nevada        |
| Children's Hospital of Nevada at UMC               | Las Vegas     | Nevada        |
| MountainView Hospital                              | Las Vegas     | Nevada        |
| Sunrise Hospital and Medical Center                | Las Vegas     | Nevada        |
| Dartmouth Hitchcock Medical Center                 | Lebanon       | New Hampshire |
| Elliot Hospital                                    | Manchester    | New Hampshire |
| Children's at Cooper University Medical Center     | Camden        | New Jersey    |
| JFK Medical Center                                 | Edison        | New Jersey    |
| Englewood Hospital and Medical Center              | Englewood     | New Jersey    |
| Hackensack University Medical Center               | Hackensack    | New Jersey    |
| Jersey City Medical Center                         | Jersey City   | New Jersey    |
| Cooperman Barnabas Medical Center                  | Livingston    | New Jersey    |
| Monmouth Medical Center                            | Long Branch   | New Jersey    |
| Mountainside Hospital                              | Montclair     | New Jersey    |
| Goryeb Children's Hospital                         | Morristown    | New Jersey    |
| Jersey Shore University Medical Center             | Neptune       | New Jersey    |
| Robert Wood Johnson University Hospital            | New Brunswick | New Jersey    |
| St. Peter's Medical Center                         | New Brunswick | New Jersey    |
| Children's Hospital of New Jersey at NBIMC         | Newark        | New Jersey    |
| University Hospital Rutgers-NJMS                   | Newark        | New Jersey    |
| St. Joseph Hospital and Medical Center             | Paterson      | New Jersey    |
| Capital Health Medical Center-Hopewell             | Pennington    | New Jersey    |
| Penn Medicine Princeton Medical Center             | Plainsboro    | New Jersey    |
| Atlanticare Regional Medical Center, NICU          | Pomona        | New Jersey    |
| Shore Medical Center                               | Somers Point  | New Jersey    |
| Inspira Health Network                             | Vineland      | New Jersey    |
| Virtua Hospital Systems                            | Voorhees      | New Jersey    |
| Hackensack UMC at Pascack Valley                   | Westwood      | New Jersey    |
| Children's Medical Center at Presbyterian Hospital | Albuquerque   | New Mexico    |
| Lovelace Women's Hospital                          | Albuquerque   | New Mexico    |
| University of New Mexico Health Sciences Center    | Albuquerque   | New Mexico    |
| Albany Medical Center                              | Albany        | New York      |
| St. Peter's Hospital                               | Albany        | New York      |
| Montefiore Medical Center-Wakefield Division       | Bronx         | New York      |
| NYC Health + Hospitals, Jacobi Medical Center      | Bronx         | New York      |
| Weiler Hospital Montefiore                         | Bronx         | New York      |
| Brookdale Hospital Medical Center                  | Brooklyn      | New York      |
| Brooklyn Hospital Center, The                      | Brooklyn      | New York      |
| Maimonides Medical Center                          | Brooklyn      | New York      |
| NYC Health + Hospitals, Kings County               | Brooklyn      | New York      |
| NYU Lutheran Medical Center                        | Brooklyn      | New York      |
| University Hospital of Brooklyn                    | Brooklyn      | New York      |
| Sisters of Charity Hospital                        | Buffalo       | New York      |
| NYC Health + Hospitals, Elmhurst                   | Elmhurst      | New York      |
| Arnot Ogden Medical Center                         | Elmira        | New York      |
| North Shore University Hospital                    | Manhasset     | New York      |
| NYU Winthrop                                       | Mineola       | New York      |
| Northern Westchester Hospital                      | Mount Kisco   | New York      |
| Cohen Children's Medical Center of New York        | New Hyde Park | New York      |
| Columbia University Medical Center                 | New York      | New York      |
| Lenox Hill Hospital                                | New York      | New York      |
| Mt. Sinai Kravis Children's Hospital, The          | New York      | New York      |
| NYC Health + Hospitals, Bellevue                   | New York      | New York      |
| NYC Health + Hospitals, Harlem Hospital Center     | New York      | New York      |
| Tisch Hospital, NYU Medical Center                 | New York      | New York      |
| Weill Cornell Medical Center                       | New York      | New York      |

**SUPPLEMENTAL TABLE 10** Continued

|                                                    |                  |                |
|----------------------------------------------------|------------------|----------------|
| Vassar Brothers Hospital                           | Poughkeepsie     | New York       |
| Golisano Children's Hospital at Strong             | Rochester        | New York       |
| Richmond University Medical Center                 | Staten Island    | New York       |
| Staten Island University Hospital                  | Staten Island    | New York       |
| Stony Brook University Medical Center              | Stony Brook      | New York       |
| Crouse Health Baker Regional NICU                  | Syracuse         | New York       |
| St. Joseph's Health Center                         | Syracuse         | New York       |
| Good Samaritan Hospital Medical Center             | West Islip       | New York       |
| Mission Children's Hospital                        | Asheville        | North Carolina |
| North Carolina Children's Hospital                 | Chapel Hill      | North Carolina |
| Carolinas Medical Center                           | Charlotte        | North Carolina |
| Novant Health Presbyterian Medical Center          | Charlotte        | North Carolina |
| Jeff Gordon Children's Hospital at CMC             | Concord          | North Carolina |
| Duke University                                    | Durham           | North Carolina |
| Cape Fear Valley Medical Center                    | Fayetteville     | North Carolina |
| Cone Health Women & Children's Center at Moses Con | Greensboro       | North Carolina |
| Vidant Medical Center                              | Greenville       | North Carolina |
| Catawba Valley Medical Center                      | Hickory          | North Carolina |
| Onslow Memorial Hospital                           | Jacksonville     | North Carolina |
| FirstHealth Moore Regional Hospital                | Pinehurst        | North Carolina |
| Rex Hospital                                       | Raleigh          | North Carolina |
| WakeMedical Center                                 | Raleigh          | North Carolina |
| Novant Health New Hanover Regional Medical Center  | Wilmington       | North Carolina |
| Brenner Children's Hospital at WFUBMC              | Winston-Salem    | North Carolina |
| Forsyth Memorial Hospital                          | Winston-Salem    | North Carolina |
| Sanford Bismarck Medical Center                    | Bismarck         | North Dakota   |
| Essentia Health                                    | Fargo            | North Dakota   |
| Sanford Medical Center Fargo                       | Fargo            | North Dakota   |
| Altru Health System                                | Grand Forks      | North Dakota   |
| Trinity Hospital                                   | Minot            | North Dakota   |
| Akron Children's Hospital                          | Akron            | Ohio           |
| Akron Children's Special Care Nursery at Summa     | Akron            | Ohio           |
| Akron Children's NICU at St. Elizabeth, Boardman   | Boardman         | Ohio           |
| Akron Children's NICU at Aultman                   | Canton           | Ohio           |
| Children's Hospital Medical Center Cincinnati      | Cincinnati       | Ohio           |
| Good Samaritan Hospital                            | Cincinnati       | Ohio           |
| University Hospital, Cincinnati                    | Cincinnati       | Ohio           |
| Cleveland Clinic Foundation, The                   | Cleveland        | Ohio           |
| Fairview Hospital                                  | Cleveland        | Ohio           |
| MetroHealth Medical Center                         | Cleveland        | Ohio           |
| Rainbow Babies & Children's Hospital               | Cleveland        | Ohio           |
| Mount Carmel East                                  | Columbus         | Ohio           |
| NCH Main Campus                                    | Columbus         | Ohio           |
| NCH NICU at Ohio State Medical Center              | Columbus         | Ohio           |
| NCH at Doctor's Hospital West                      | Columbus         | Ohio           |
| NCH at Grant Medical Center                        | Columbus         | Ohio           |
| NCH at Riverside Methodist Hospital                | Columbus         | Ohio           |
| Dayton Children's Hospital                         | Dayton           | Ohio           |
| Miami Valley Hospital                              | Dayton           | Ohio           |
| NCH at Dublin Methodist Hospital                   | Dublin           | Ohio           |
| Mount Carmel Grove City                            | Grove City       | Ohio           |
| Kettering Medical Center                           | Kettering        | Ohio           |
| CCF Children's, Hillcrest NICU                     | Mayfield Heights | Ohio           |
| Mercy Children's Hospital                          | Toledo           | Ohio           |
| Russell J. Ebeid Children's Hospital               | Toledo           | Ohio           |
| NCH NICU at Mount Carmel St. Ann's Hospital        | Westerville      | Ohio           |
| Mercy Hospital Oklahoma City                       | Oklahoma City    | Oklahoma       |
| O.U. Health Sciences Center                        | Oklahoma City    | Oklahoma       |
| Ascension St John Medical Center                   | Tulsa            | Oklahoma       |
| Henry Zarrow NICU                                  | Tulsa            | Oklahoma       |
| Peggy V. Helmerich Women's Center                  | Tulsa            | Oklahoma       |
| St. Charles Health Care                            | Bend             | Oregon         |

**SUPPLEMENTAL TABLE 10** Continued

|                                                    |               |                |
|----------------------------------------------------|---------------|----------------|
| Kaiser Sunnyside Medical Center                    | Clackamas     | Oregon         |
| Rogue Regional Medical Center                      | Medford       | Oregon         |
| Oregon Health and Science University               | Portland      | Oregon         |
| Providence Portland Medical Center                 | Portland      | Oregon         |
| Providence St. Vincent Medical Center              | Portland      | Oregon         |
| Randall Children's Hospital at Legacy Emanuel      | Portland      | Oregon         |
| Salem Hospital                                     | Salem         | Oregon         |
| PeaceHealth Riverbend                              | Springfield   | Oregon         |
| Abington Memorial Hospital                         | Abington      | Pennsylvania   |
| Lehigh Valley Health Network                       | Allentown     | Pennsylvania   |
| St. Luke's Allentown Campus                        | Allentown     | Pennsylvania   |
| St. Luke's University Hospital                     | Bethlehem     | Pennsylvania   |
| Bryn Mawr Hospital                                 | Bryn Mawr     | Pennsylvania   |
| Geisinger Medical Center                           | Danville      | Pennsylvania   |
| Penn Highlands DuBois                              | DuBois        | Pennsylvania   |
| Einstein Medical Center Montgomery                 | East Norriton | Pennsylvania   |
| St. Luke's Hospital, Anderson Campus               | Easton        | Pennsylvania   |
| Penn State Heath Hampden Medical Center            | Enola         | Pennsylvania   |
| Ephrata Community Hospital                         | Ephrata       | Pennsylvania   |
| Hamot Medical Center                               | Erie          | Pennsylvania   |
| St. Vincent Health Center                          | Erie          | Pennsylvania   |
| Pinnacle Health Hospitals                          | Harrisburg    | Pennsylvania   |
| Penn State Children's Hospital                     | Hershey       | Pennsylvania   |
| Conemaugh Memorial Medical Center                  | Johnstown     | Pennsylvania   |
| Lancaster General Health-Women & Babies Hospital   | Lancaster     | Pennsylvania   |
| St. Mary Medical Center                            | Langhorne     | Pennsylvania   |
| Holy Redeemer Hospital and Medical Center          | Meadowbrook   | Pennsylvania   |
| Children's Hospital of Philadelphia Newborn Center | Philadelphia  | Pennsylvania   |
| Einstein Medical Center Philadelphia               | Philadelphia  | Pennsylvania   |
| Hahnemann University Hospital                      | Philadelphia  | Pennsylvania   |
| Hospital of the University of Pennsylvania         | Philadelphia  | Pennsylvania   |
| Pennsylvania Hospital                              | Philadelphia  | Pennsylvania   |
| Temple University Hospital                         | Philadelphia  | Pennsylvania   |
| Thomas Jefferson University Hospital               | Philadelphia  | Pennsylvania   |
| Magee-Womens Hospital of UPMC                      | Pittsburgh    | Pennsylvania   |
| Western Pennsylvania Hospital                      | Pittsburgh    | Pennsylvania   |
| Reading Hospital-Tower Health                      | Reading       | Pennsylvania   |
| Moses Taylor Hospital                              | Scranton      | Pennsylvania   |
| Crozer Chester Medical Center                      | Upland        | Pennsylvania   |
| CHOP Newborn Care at Chester County Hospital       | West Chester  | Pennsylvania   |
| Geisinger Wyoming Valley Medical Center            | Wilkes-Barre  | Pennsylvania   |
| Lankenau Medical Center                            | Wynnewood     | Pennsylvania   |
| WellSpan York Hospital                             | York          | Pennsylvania   |
| Women & Infants Hospital                           | Providence    | Rhode Island   |
| Shawn Jenkins Children's Hospital                  | Charleston    | South Carolina |
| Trident Medical Center                             | Charleston    | South Carolina |
| Palmetto Health Richland                           | Columbia      | South Carolina |
| Prisma Health Baptist                              | Columbia      | South Carolina |
| McLeod Regional Medical Center                     | Florence      | South Carolina |
| Children's Hospital of Greenville                  | Greenville    | South Carolina |
| St. Francis Eastside                               | Greenville    | South Carolina |
| Piedmont Medical Center                            | Rock Hill     | South Carolina |
| Spartanburg Regional Healthcare System             | Spartanburg   | South Carolina |
| Summerville Medical Center                         | Summerville   | South Carolina |
| Monument Health Rapid City Hospital                | Rapid City    | South Dakota   |
| Avera McKennan                                     | Sioux Falls   | South Dakota   |
| Boekelheide NICU at Sanford Health                 | Sioux Falls   | South Dakota   |
| Children's Hospital at Erlanger                    | Chattanooga   | Tennessee      |
| Parkridge East Hospital                            | Chattanooga   | Tennessee      |
| Maury Regional Medical Center                      | Columbia      | Tennessee      |
| TriStar Summit Medical Center                      | Hermitage     | Tennessee      |
| Jackson Madison County General Hospital            | Jackson       | Tennessee      |

**SUPPLEMENTAL TABLE 10** Continued

|                                                        |                |           |
|--------------------------------------------------------|----------------|-----------|
| Niswonger Children's Hospital                          | Johnson City   | Tennessee |
| East Tennessee Children's Hospital                     | Knoxville      | Tennessee |
| University of Tennessee Medical Center                 | Knoxville      | Tennessee |
| Baptist Memorial Hospital for Women                    | Memphis        | Tennessee |
| Regional One Health                                    | Memphis        | Tennessee |
| Children's Hospital at TriStar Centennial, The         | Nashville      | Tennessee |
| Monroe Carell Jr. Children's Hospital Vanderbilt       | Nashville      | Tennessee |
| Hendrick Medical Center                                | Abilene        | Texas     |
| Hendrick Medical Center South                          | Abilene        | Texas     |
| Baptist St. Anthony's Health System                    | Amarillo       | Texas     |
| Northwest Texas Healthcare System                      | Amarillo       | Texas     |
| Medical City Arlington                                 | Arlington      | Texas     |
| Texas Health Arlington Memorial Hospital               | Arlington      | Texas     |
| Ascension Seton Medical Center Austin                  | Austin         | Texas     |
| Dell Children's Medical Center of Central Texas        | Austin         | Texas     |
| North Austin Medical Center                            | Austin         | Texas     |
| St. David's Medical Center                             | Austin         | Texas     |
| St. David's South Austin Medical Center                | Austin         | Texas     |
| CHRISTUS Southeast Texas Hospital                      | Beaumont       | Texas     |
| Valley Baptist Medical Center, Brownsville             | Brownsville    | Texas     |
| Valley Regional Medical Center TX                      | Brownsville    | Texas     |
| HCA Houston Healthcare Conroe                          | Conroe         | Texas     |
| Christus Spohn Hospital Corpus Christi South           | Corpus Christi | Texas     |
| Corpus Christi Medical Center                          | Corpus Christi | Texas     |
| Driscoll Children's Hospital                           | Corpus Christi | Texas     |
| Memorial Hermann Cypress Hospital                      | Cypress        | Texas     |
| Medical City Dallas                                    | Dallas         | Texas     |
| Methodist Dallas Medical Center                        | Dallas         | Texas     |
| Texas Health Presbyterian Hospital Dallas              | Dallas         | Texas     |
| University of Texas Southwestern Medical Center Dallas | Dallas         | Texas     |
| William P. Clements Jr. University Hospital            | Dallas         | Texas     |
| Texas Health Presbyterian Hospital Denton              | Denton         | Texas     |
| Women's Hospital At Renaissance                        | Edinburg       | Texas     |
| Del Sol Medical Center                                 | El Paso        | Texas     |
| El Paso Children's Hospital                            | El Paso        | Texas     |
| Las Palmas Medical Center                              | El Paso        | Texas     |
| Texas Health Presbyterian Hospital Flower Mound        | Flower Mound   | Texas     |
| Baylor All Saints Medical Center                       | Fort Worth     | Texas     |
| Cook Children's Medical Center                         | Fort Worth     | Texas     |
| Harris Methodist Fort Worth Hospital                   | Fort Worth     | Texas     |
| John Peter Smith Hospital                              | Fort Worth     | Texas     |
| Medical City Alliance                                  | Fort Worth     | Texas     |
| Medical City Frisco                                    | Frisco         | Texas     |
| University of Texas Medical Branch                     | Galveston      | Texas     |
| Valley Baptist Medical Center, Harlingen               | Harlingen      | Texas     |
| Ben Taub General Hospital                              | Houston        | Texas     |
| Children's Memorial Hermann Hospital                   | Houston        | Texas     |
| HCA Houston Healthcare Cypress Fairbanks               | Houston        | Texas     |
| HCA Houston Healthcare Northwest                       | Houston        | Texas     |
| Houston Methodist West Hospital                        | Houston        | Texas     |
| Lyndon B. Johnson General Hospital                     | Houston        | Texas     |
| Memorial Hermann Greater Heights Hospital              | Houston        | Texas     |
| Memorial Hermann Memorial City Medical Center          | Houston        | Texas     |
| Memorial Hermann Southeast                             | Houston        | Texas     |
| Memorial Hermann Southwest                             | Houston        | Texas     |
| Methodist Willowbrook Hospital                         | Houston        | Texas     |
| St. Joseph Hospital                                    | Houston        | Texas     |
| Texas Children's Hospital, Baylor College of Medicine  | Houston        | Texas     |
| Woman's Hospital of Texas, The                         | Houston        | Texas     |
| Memorial Hermann Northeast Hospital                    | Humble         | Texas     |
| Memorial Hermann Katy Hospital                         | Katy           | Texas     |
| HCA Houston Healthcare Kingwood                        | Kingwood       | Texas     |

**SUPPLEMENTAL TABLE 10** Continued

|                                                       |                 |            |
|-------------------------------------------------------|-----------------|------------|
| Medical City Lewisville                               | Lewisville      | Texas      |
| Christus Good Shepherd Medical Center                 | Longview        | Texas      |
| Longview Regional Medical Center                      | Longview        | Texas      |
| Covenant Children's Hospital                          | Lubbock         | Texas      |
| University Medical Center                             | Lubbock         | Texas      |
| Methodist Mansfield Medical Center                    | Mansfield       | Texas      |
| Rio Grande Regional Hospital                          | McAllen         | Texas      |
| Medical City of McKinney                              | McKinney        | Texas      |
| HCA Houston Healthcare Southeast                      | Pasadena        | Texas      |
| Medical City Plano                                    | Plano           | Texas      |
| Texas Health Presbyterian Hospital Plano              | Plano           | Texas      |
| Methodist Richardson Medical Center                   | Richardson      | Texas      |
| Lake Pointe Medical Center                            | Rowlett         | Texas      |
| Children's Hospital of San Antonio                    | San Antonio     | Texas      |
| Methodist Children's Hospital                         | San Antonio     | Texas      |
| Methodist Stone Oak Hospital                          | San Antonio     | Texas      |
| Metropolitan Methodist Hospital                       | San Antonio     | Texas      |
| North Central Baptist Hospital                        | San Antonio     | Texas      |
| St. Luke's Baptist Hospital                           | San Antonio     | Texas      |
| University Hospital San Antonio                       | San Antonio     | Texas      |
| Houston Methodist Sugar Land Hospital                 | Sugar Land      | Texas      |
| Baylor Scott & White McLane Children's Medical Center | Temple          | Texas      |
| Christus St. Michael Health System                    | Texarkana       | Texas      |
| Houston Methodist The Woodlands Hospital              | The Woodlands   | Texas      |
| Memorial Hermann The Woodlands                        | The Woodlands   | Texas      |
| St. Luke's The Woodlands Hospital                     | The Woodlands   | Texas      |
| Texas Children's Hospital The Woodlands               | The Woodlands   | Texas      |
| Christus Trinity Mother Frances Health System         | Tyler           | Texas      |
| DeTar Hospital North                                  | Victoria        | Texas      |
| Baylor Scott & White Medical Center, Hillcrest        | Waco            | Texas      |
| HCA Houston Healthcare Clear Lake                     | Webster         | Texas      |
| Intermountain Medical Center                          | Murray          | Utah       |
| McKay Dee Hospital Center                             | Ogden           | Utah       |
| Ogden Regional Medical Center                         | Ogden           | Utah       |
| Timpanogos Regional Hospital                          | Orem            | Utah       |
| Utah Valley Regional Medical Center                   | Provo           | Utah       |
| St. George Regional Medical Center                    | Saint George    | Utah       |
| St. Mark's Hospital                                   | Salt Lake City  | Utah       |
| University of Utah Health Sciences Center             | Salt Lake City  | Utah       |
| University of Vermont Children's Hospital             | Burlington      | Vermont    |
| Inova Alexandria Hospital (NICU)                      | Alexandria      | Virginia   |
| Virginia Hospital Center                              | Arlington       | Virginia   |
| University of Virginia                                | Charlottesville | Virginia   |
| Inova Fair Oaks Hospital                              | Fairfax         | Virginia   |
| INOVA Children's Hospital                             | Falls Church    | Virginia   |
| Mary Washington Hospital                              | Fredericksburg  | Virginia   |
| Spotsylvania Regional Medical Center                  | Fredericksburg  | Virginia   |
| Inova Loudoun Hospital                                | Leesburg        | Virginia   |
| Centra Health, Virginia Baptist Hospital              | Lynchburg       | Virginia   |
| Children's Hospital of the King's Daughters           | Norfolk         | Virginia   |
| Reston Hospital Center                                | Reston          | Virginia   |
| Bon Secours St. Mary's Hospital                       | Richmond        | Virginia   |
| CJW Medical Center, Chippenham Campus                 | Richmond        | Virginia   |
| Children's Hosp of Richmond at VCU                    | Richmond        | Virginia   |
| Henrico Doctors' Hospital                             | Richmond        | Virginia   |
| Johnston-Willis Hospital                              | Richmond        | Virginia   |
| Sentara Northern Virginia Medical Center              | Woodbridge      | Virginia   |
| Overlake Hospital Medical Center                      | Bellevue        | Washington |
| Providence Regional Medical Center Everett            | Everett         | Washington |
| Evergreen Health                                      | Kirkland        | Washington |
| UW Medicine, Valley Medical Center                    | Renton          | Washington |
| Kadlec Regional Medical Center                        | Richland        | Washington |

**SUPPLEMENTAL TABLE 10** Continued

|                                                    |             |               |
|----------------------------------------------------|-------------|---------------|
| Swedish Med Cen-First Hill Pavilion                | Seattle     | Washington    |
| University of Washington Medical Center            | Seattle     | Washington    |
| Deaconess Hospital                                 | Spokane     | Washington    |
| Providence Sacred Heart Medical Center & Childrens | Spokane     | Washington    |
| MultiCare Health System-Tacoma General Hospital    | Tacoma      | Washington    |
| St. Joseph Medical Center                          | Tacoma      | Washington    |
| Legacy Salmon Creek Hospital                       | Vancouver   | Washington    |
| PeaceHealth Southwest Medical Center               | Vancouver   | Washington    |
| Yakima Valley Memorial Hospital                    | Yakima      | Washington    |
| Charleston Area Medical Center                     | Charleston  | West Virginia |
| Cabell Huntington Hospital, Inc.                   | Huntington  | West Virginia |
| Berkeley Medical Center                            | Martinsburg | West Virginia |
| West Virginia University School of Medicine        | Morgantown  | West Virginia |
| Ascension NE Wisconsin, St Elizabeth Campus        | Appleton    | Wisconsin     |
| Aurora Baycare Medical Center                      | Green Bay   | Wisconsin     |
| St. Vincent Hospital                               | Green Bay   | Wisconsin     |
| Gundersen Lutheran Medical Center                  | La Crosse   | Wisconsin     |
| Meriter Hospital                                   | Madison     | Wisconsin     |
| SSM Health St. Mary's Hospital Madison             | Madison     | Wisconsin     |
| Marshfield Medical Center, Marshfield              | Marshfield  | Wisconsin     |
| Ascension Columbia St. Mary's Hospital Milwaukee   | Milwaukee   | Wisconsin     |
| Ascension SE Wisconsin Hospital, St Joseph Campus  | Milwaukee   | Wisconsin     |
| Aurora Sinai Medical Center                        | Milwaukee   | Wisconsin     |
| Children's Hospital of Wisconsin, Fox Valley       | Neenah      | Wisconsin     |
| Ascension All Saints Hospital                      | Racine      | Wisconsin     |
| Waukesha Memorial Hospital                         | Waukesha    | Wisconsin     |
| Aspirus Wausau Hospital                            | Wausau      | Wisconsin     |
| Children's Wisconsin                               | Wauwatosa   | Wisconsin     |
| Aurora Women's Pavilion                            | West Allis  | Wisconsin     |
